# Supplementary material
Source: Springer Nature journal article supplement (https://www.springermedizin.de/resource/supplementary/13058_2012_3224_MOESM16_ESM.pdf/9703556)

**A**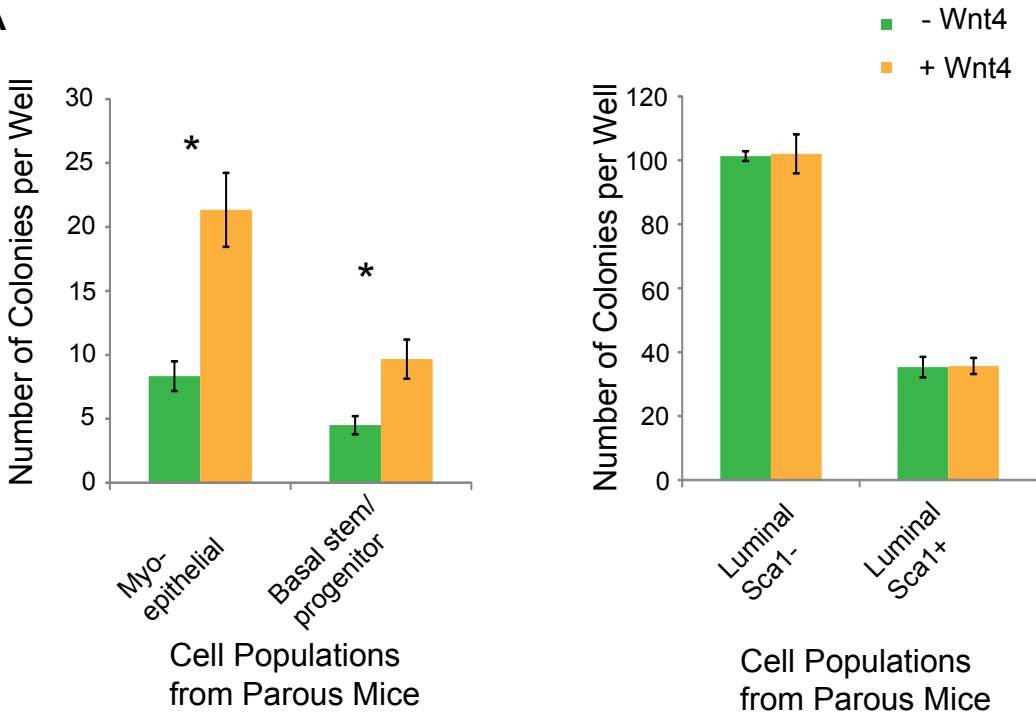**B**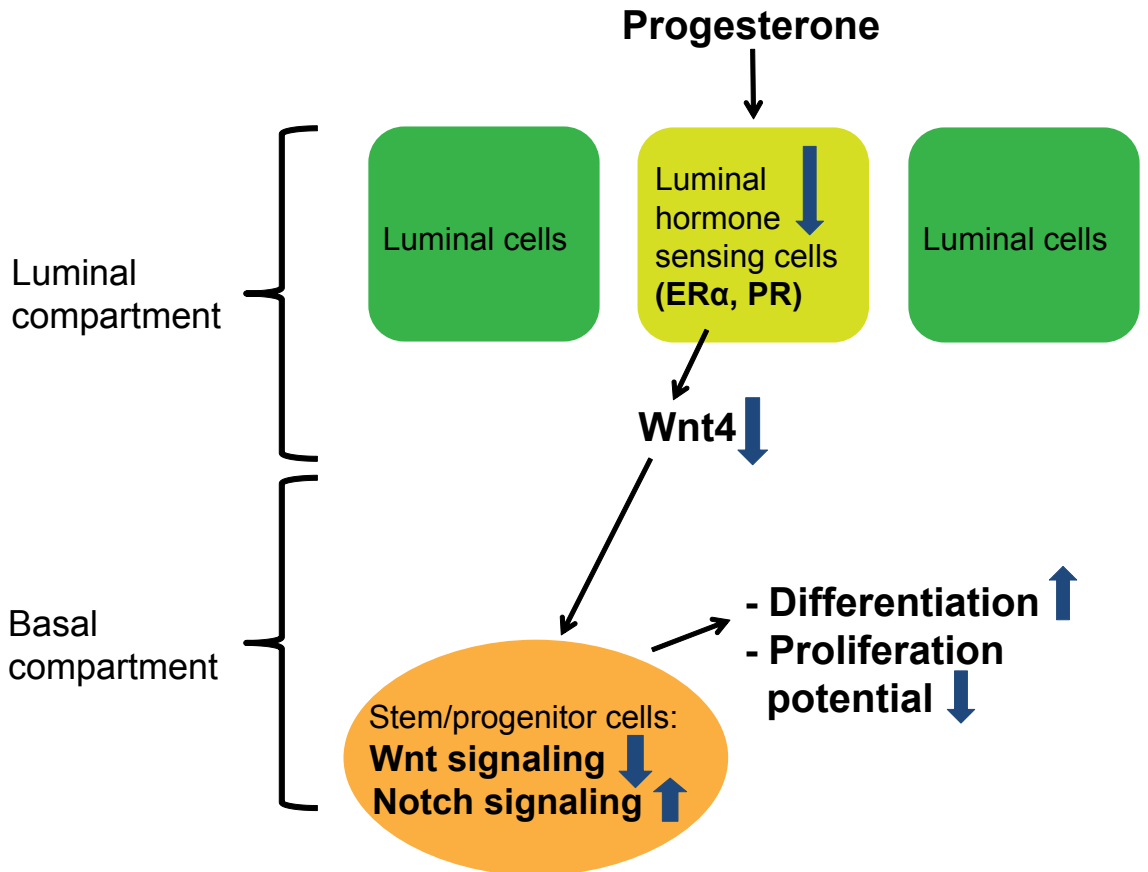

Supplement: MOESM16 [file 9703556]
